# Supplementary material for: Dissecting ribosomal particles throughout the kingdoms of life using advanced hybrid mass spectrometry methods
Source: PubMed Central journal article supplement (PMC6021402; doi:10.1038/s41467-018-04853-x), 2018-06-27
Supplement: 41467_2018_4853_MOESM2_ESM.pdf [file 41467_2018_4853_MOESM2_ESM.pdf]

## **Descriptions of Additional Supplementary Files**

File Name: Supplementary Data 1

Descriptions: Proteins identified in the bottom-up LC-MS/MS analysis of Hs40S, Hs60S, and So70S ribosomal purifications. The ranking of proteins is performed following the iBAQ values for each ribosomal protein in the purifications.

File Name: Supplementary Data 2

Descriptions: Ribosomal proteins identified in top-down LC-MS/MS of So70S chloroplactic ribosomal particle. Sequences available in databases were manually adjusted with sequence processing events confirmed in protein spectrum matches.

File Name: Supplementary Data 3

Descriptions: Theoretical average masses of proteins and experimental average masses of the most abundant proteoforms of 40S human ribosomal subunit with corresponding relative abundances.
